# Supplementary material for: Boosting lateral photosensing performances in a P(VDF-TrFE)/Bi2Se3/Si heterojunction induced by surface modification and ferroelectric and pyroelectric effects
Source: Royal Society of Chemistry journal article supplement (doi:10.1039/d4tc00139g), 2024-01-01
Supplement: d4tc00139g1.pdf [file d4tc00139g1.pdf]

## Supplementary Information

### Boosting Lateral Photosensing Performances in P(VDF-TrFE)/Bi<sub>2</sub>Se<sub>3</sub>/Si Heterojunction Induced by Surface Modification and Ferroelectric and Pyroelectric effects

*Qing Wang, Guojuan Zhang, Tao Zhang, Siyang Guo, Jihong Liu\*, Shufang Wang, Shuang Qiao\**

Hebei Key Laboratory of Optic-Electronic Information and Materials, College of Physics Science and Technology, Hebei University, Baoding 071002, P. R. China.

\*E-mail: liujihong@hbu.edu.cn, and sqiao@hbu.edu.cn

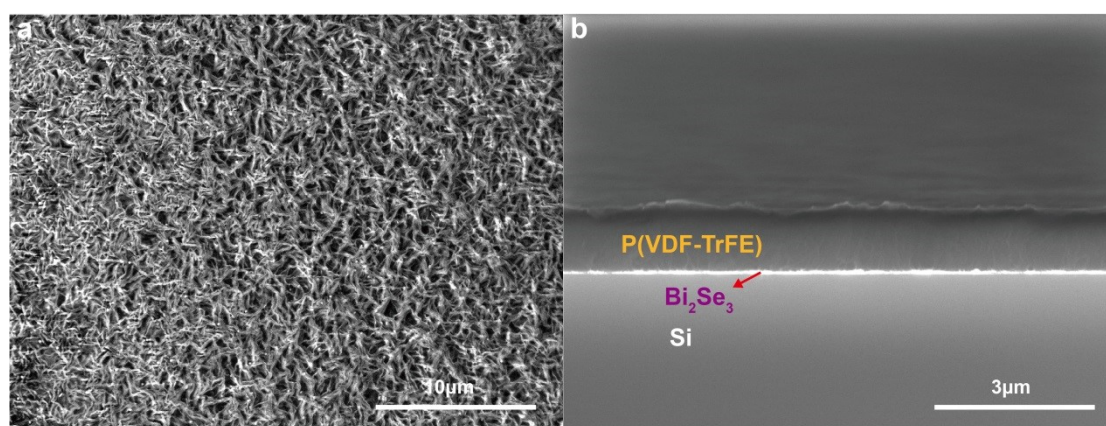

**Figure S1.** a) Top-view, and b) cross-section SEM images of the P(VDF-TrFE)/Bi<sub>2</sub>Se<sub>3</sub>/Si heterojunction.

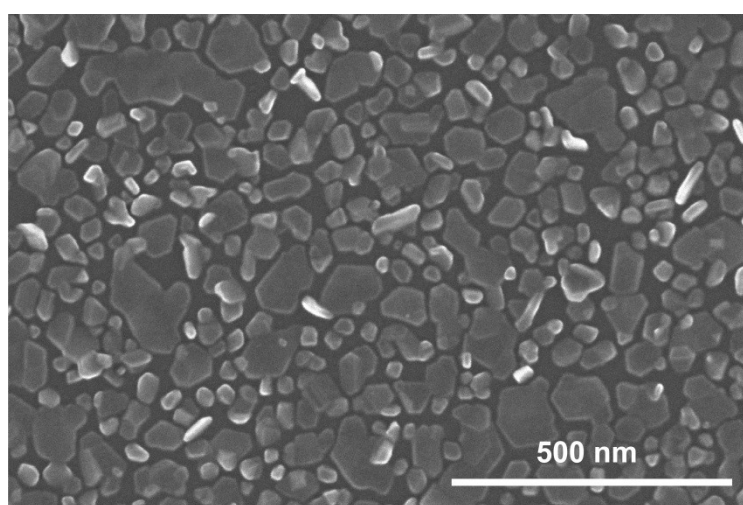

**Figure S2.** Top-view SEM image of the Bi<sub>2</sub>Se<sub>3</sub> film in a higher magnification.

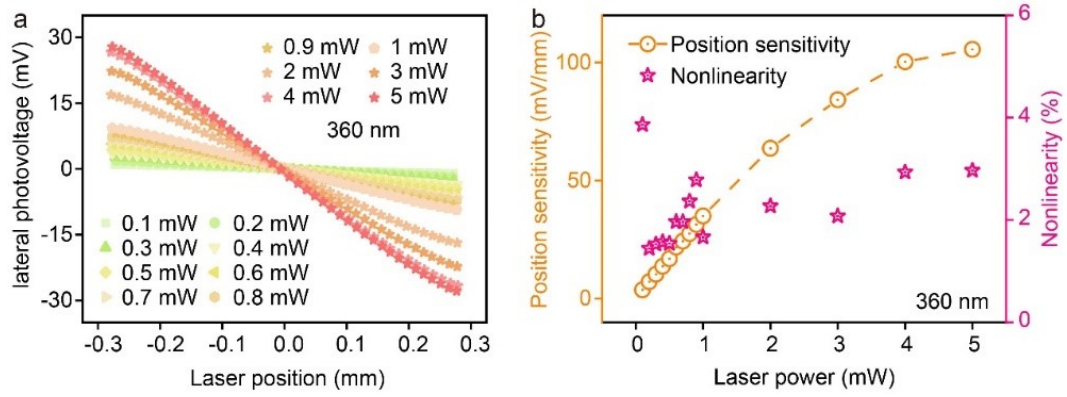

**Figure S3.** a) Laser position-dependent LPV curves under illumination of various powers of a 360 nm laser. b) Extracted position sensitivity and nonlinearity results of various laser powers.

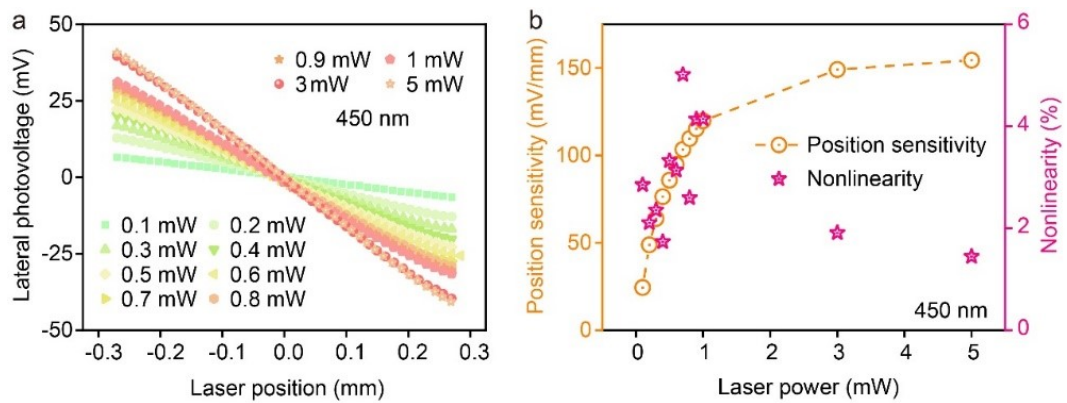

**Figure S4.** a) Laser position-dependent LPV curves under illumination of various powers of a 450 nm laser. b) Extracted position sensitivity and nonlinearity results of various laser powers.

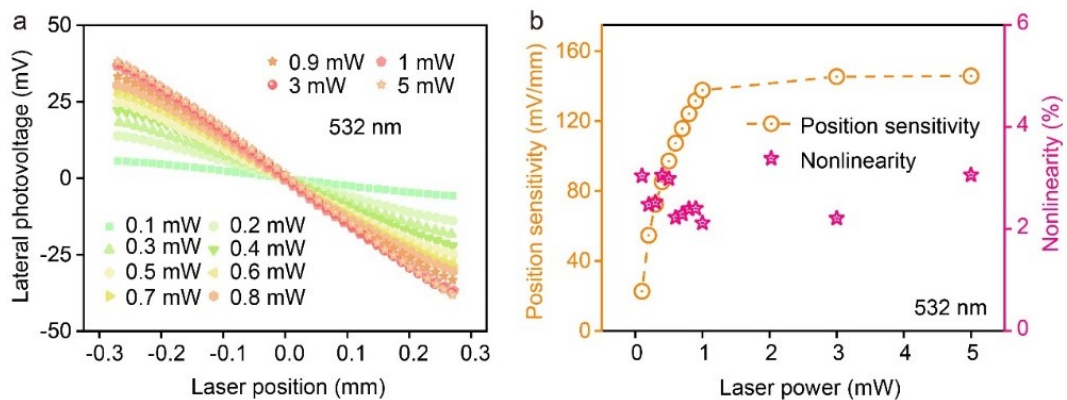

**Figure S5.** a) Laser position-dependent LPV curves under illumination of various powers of a 532 nm laser. b) Extracted position sensitivity and nonlinearity results of various laser powers.

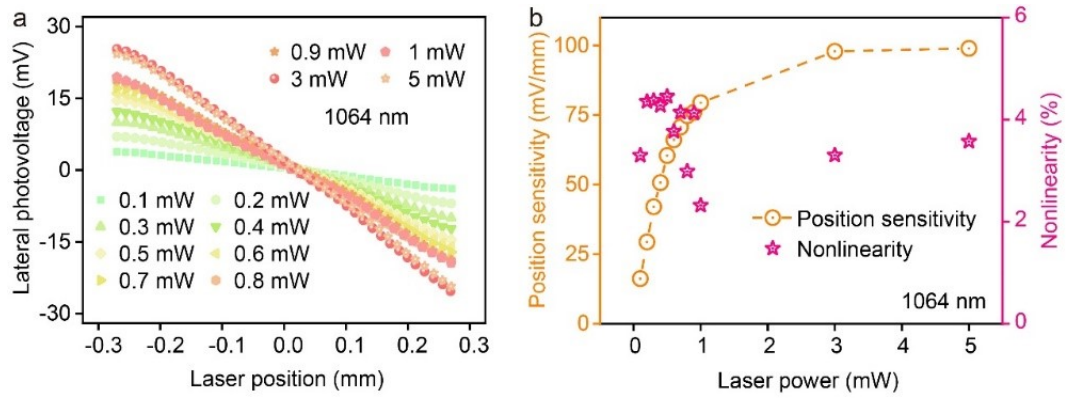

**Figure S6.** a) Laser position-dependent LPV curves under illumination of various powers of a 1064 nm laser. b) Extracted position sensitivity and nonlinearity results of various laser powers.

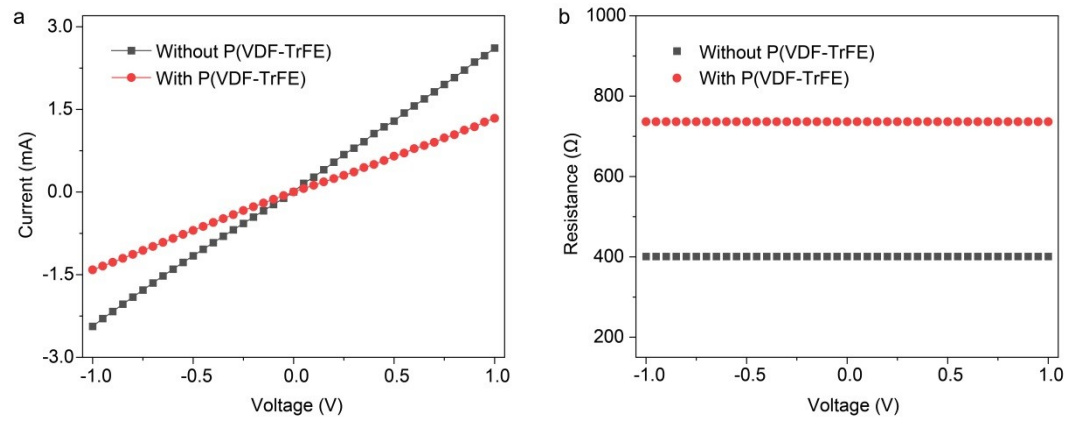

**Figure S7.** a) Transverse  $I$ - $V$  curves of the Bi<sub>2</sub>Se<sub>3</sub> film with and without P(VDF-TrFE) layer. b) Extracted resistances of the Bi<sub>2</sub>Se<sub>3</sub> film with and without P(VDF-TrFE) layer.

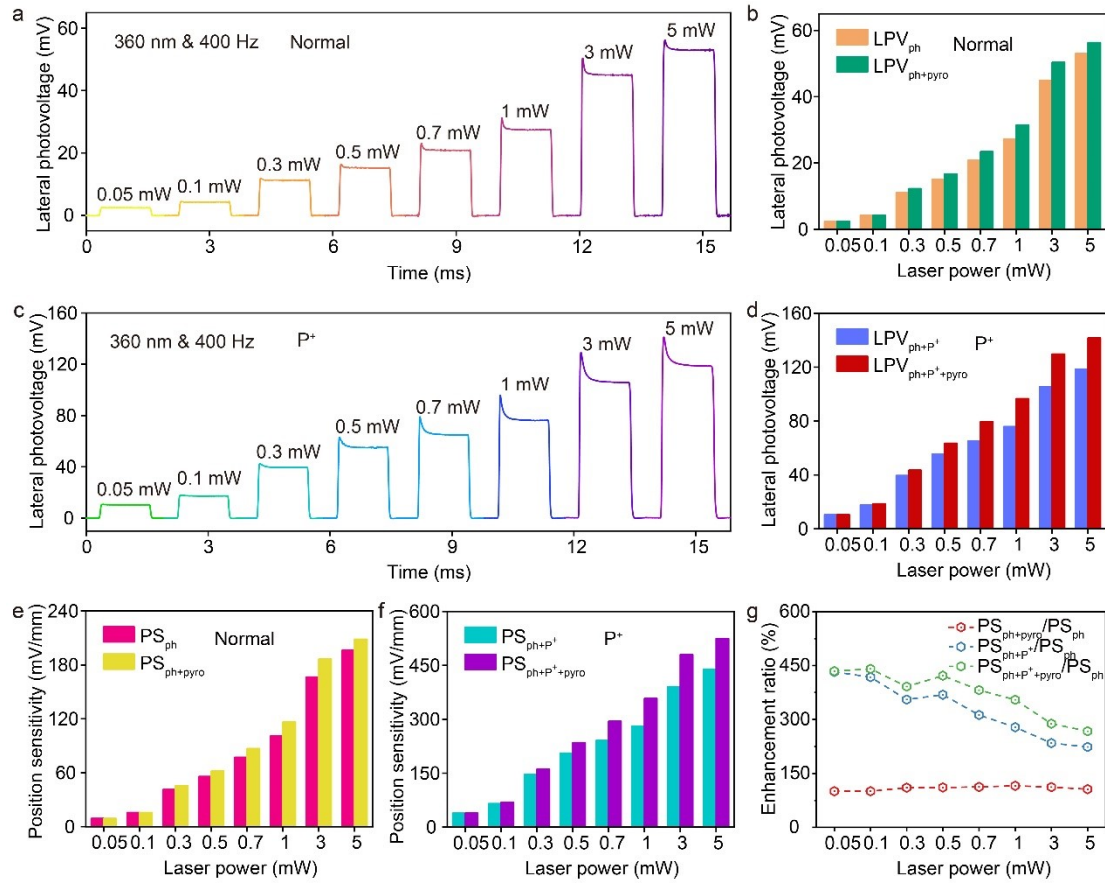

**Figure S8.** a) Transient  $LPV-t$  curves under illumination of a 360 nm laser at various powers and 400 Hz without ferroelectric polarization. b) Extracted LPV results of various laser powers. c) Transient  $LPV-t$  curves under illumination of a 360 nm at various laser power and 400 Hz with P<sup>+</sup> ferroelectric polarization. d) Extracted LPV results of various laser powers. Extracted position sensitivity results of various laser powers e) without ferroelectric polarization and f) with P<sup>+</sup> ferroelectric polarization. g) The calculated enhancement ratios of various laser powers.

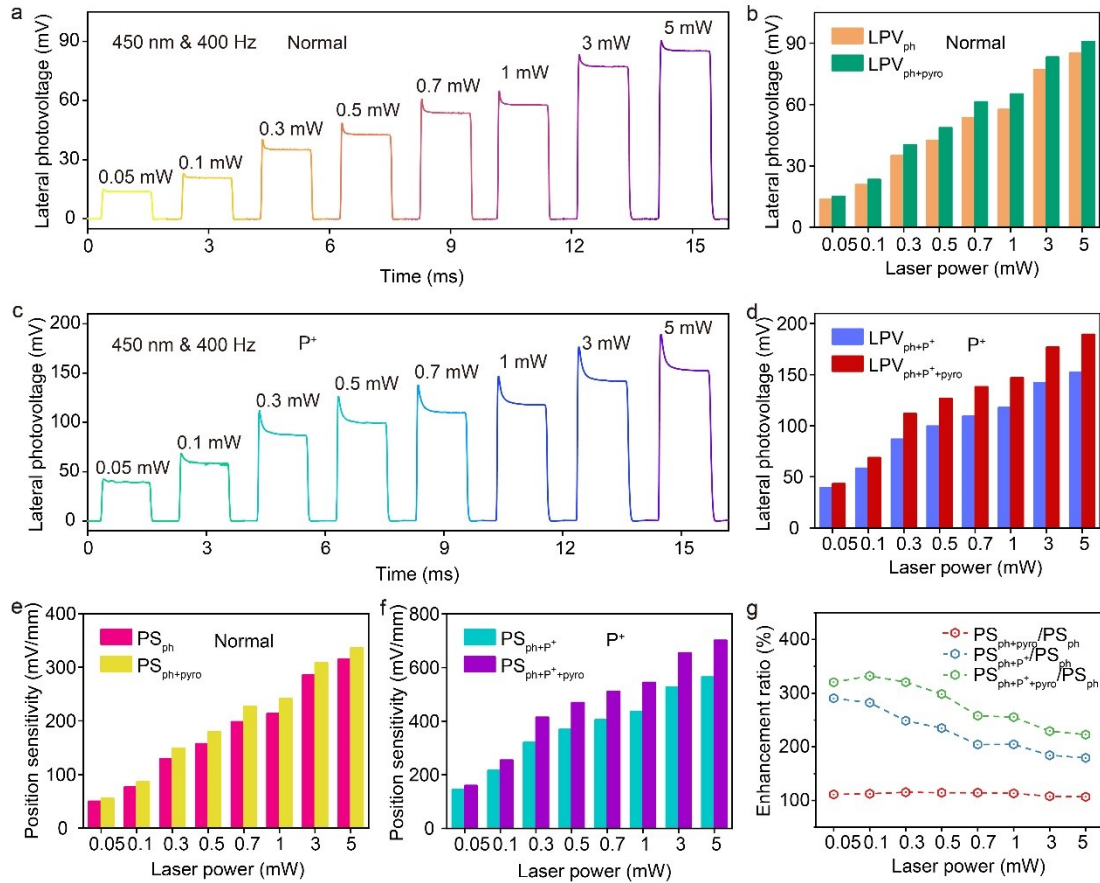

**Figure S9.** a) Transient  $LPV-t$  curves under illumination of a 450 nm laser at various powers and 400 Hz without ferroelectric polarization. b) Extracted LPV results of various laser powers. c) Transient  $LPV-t$  curves under illumination of a 450 nm at various laser power and 400 Hz with P<sup>+</sup> ferroelectric polarization. d) Extracted LPV results of various laser powers. Extracted position sensitivity results of various laser powers e) without ferroelectric polarization and f) with P<sup>+</sup> ferroelectric polarization. g) The calculated enhancement ratios of various laser powers.



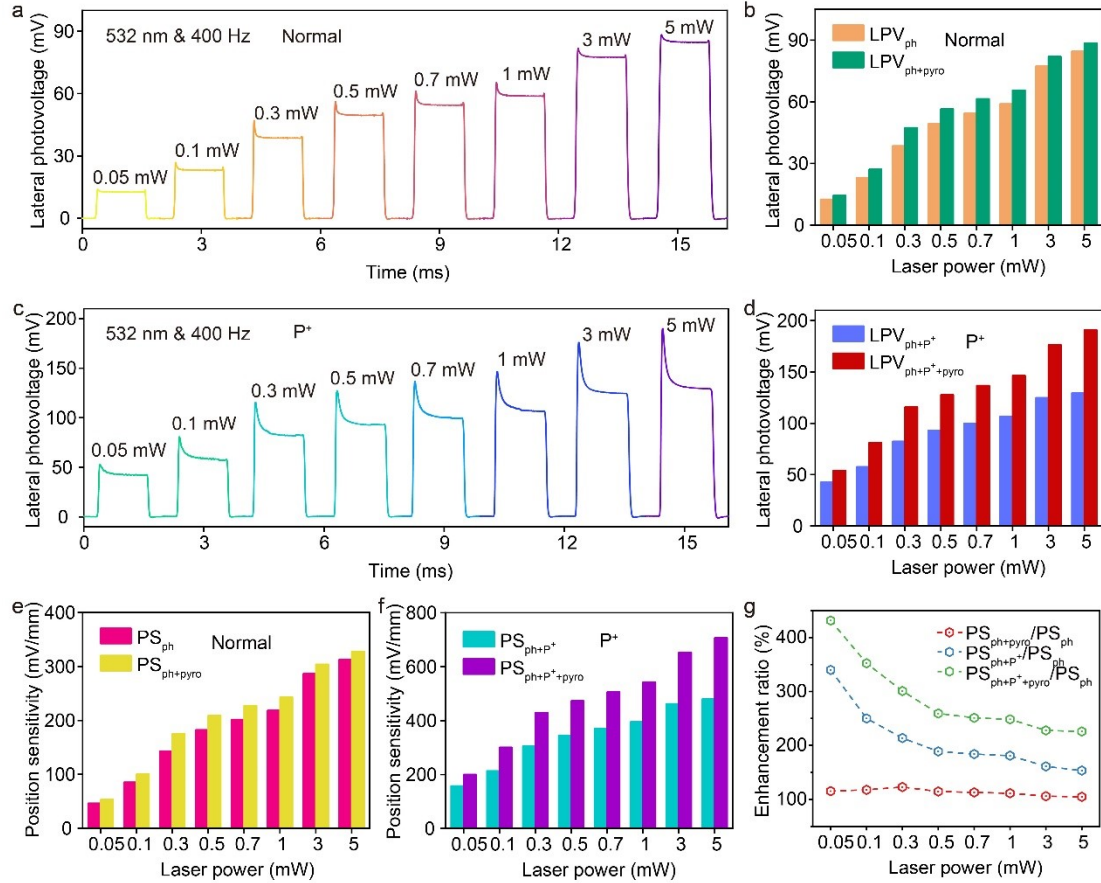

**Figure S10.** a) Transient  $LPV-t$  curves under illumination of a 532 nm laser at various powers and 400 Hz without ferroelectric polarization. b) Extracted LPV results of various laser powers. c) Transient  $LPV-t$  curves under illumination of a 532 nm at various laser power and 400 Hz with P<sup>+</sup> ferroelectric polarization. d) Extracted LPV results of various laser powers. Extracted position sensitivity results of various laser powers e) without ferroelectric polarization and f) with P<sup>+</sup> ferroelectric polarization. g) The calculated enhancement ratios of various laser powers.

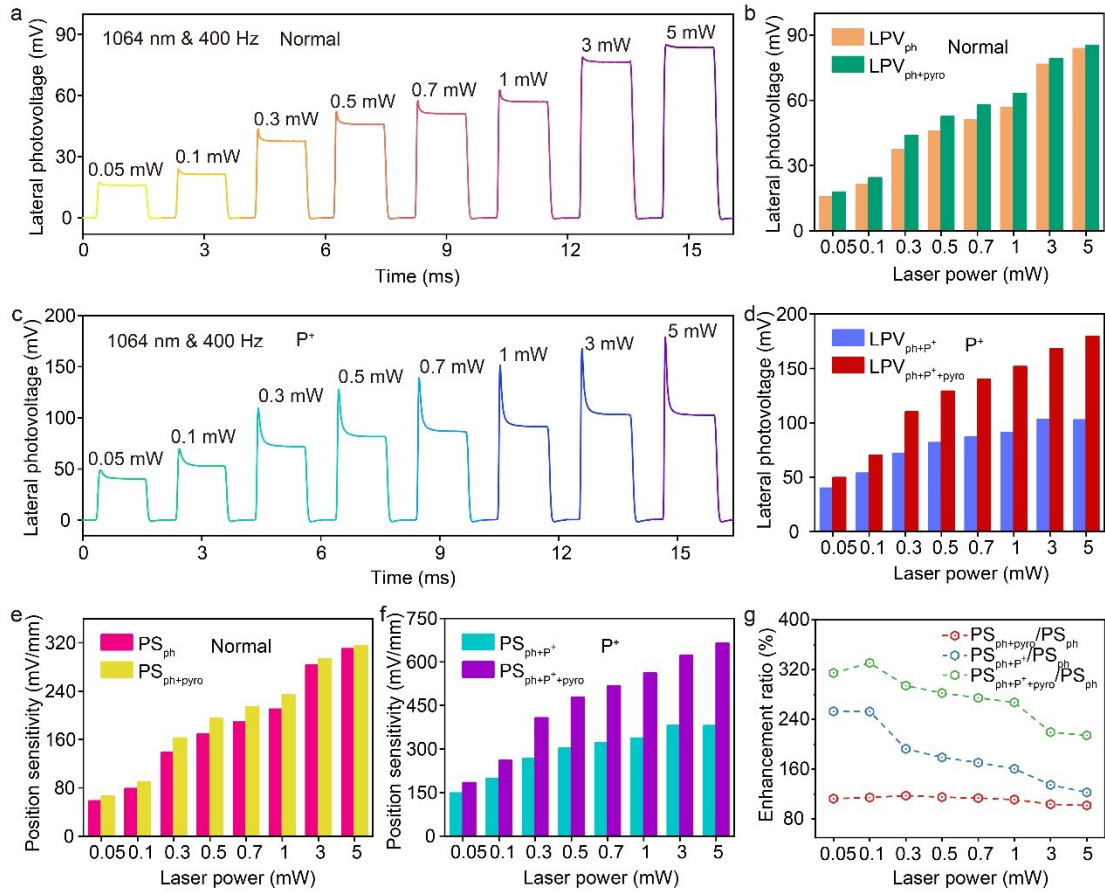

**Figure S11.** a) Transient  $LPV-t$  curves under illumination of a 1064 nm laser at various powers and 400 Hz without ferroelectric polarization. b) Extracted LPV results of various laser powers. c) Transient  $LPV-t$  curves under illumination of a 1064 nm at various laser power and 400 Hz with P<sup>+</sup> ferroelectric polarization. d) Extracted LPV results of various laser powers. Extracted position sensitivity results of various laser powers e) without ferroelectric polarization and f) with P<sup>+</sup> ferroelectric polarization. g) The calculated enhancement ratios of various laser powers.
